# Supplementary material for: Heterocarbon nanosheets incorporating iron phthalocyanine for oxygen reduction reaction in both alkaline and acidic media
Source: Royal Society of Chemistry journal article supplement (doi:10.1039/c5cp07739g), 2016-01-01
Supplement: c5cp07739g1.pdf [file c5cp07739g1.pdf]

## *Supplementary information*

### **Hetero carbon nanosheets incorporated iron-phthalocyanine for oxygen reduction reaction in both alkaline and acidic media**

Koang-Yong Hyun,<sup>a</sup> Tomonaga Ueno,<sup>a,b</sup> Gasidit Panomsuwan,<sup>c</sup> Oi Lun Li<sup>a,b</sup> and Nagahiro Saito<sup>a,b,d,e,\*</sup>

<sup>a</sup>*Department of Materials, Physics and Energy Engineering, Graduate School of Engineering, Nagoya University, Furo-cho, Chikusa-ku, Nagoya 464-8603, Japan*

<sup>b</sup>*Green Mobility Collaborative Research Center, Nagoya University, Chikusa-ku, Nagoya 464-8603, Japan*

<sup>c</sup>*NU-PPC Plasma Chemical Laboratory, The Petroleum and Petrochemical College, Chulalongkorn University, Soi Chulalongkorn 12, Phyathai Road, Bangkok 10330, Thailand*

<sup>d</sup>*Social Innovation Design Center (SIDC), Institute of Innovation for Future Society, Nagoya University, Furo-cho, Chikusa-ku, Nagoya 464-8603, Japan*

<sup>e</sup>*Core Research for Evolutional Science and Technology (CREST), Japan Science and Technology Agency (JST), Saitama 332-0012, Japan*

\*Corresponding author

E-mail: hiro@rd.numse.nagoya-u.ac.jp

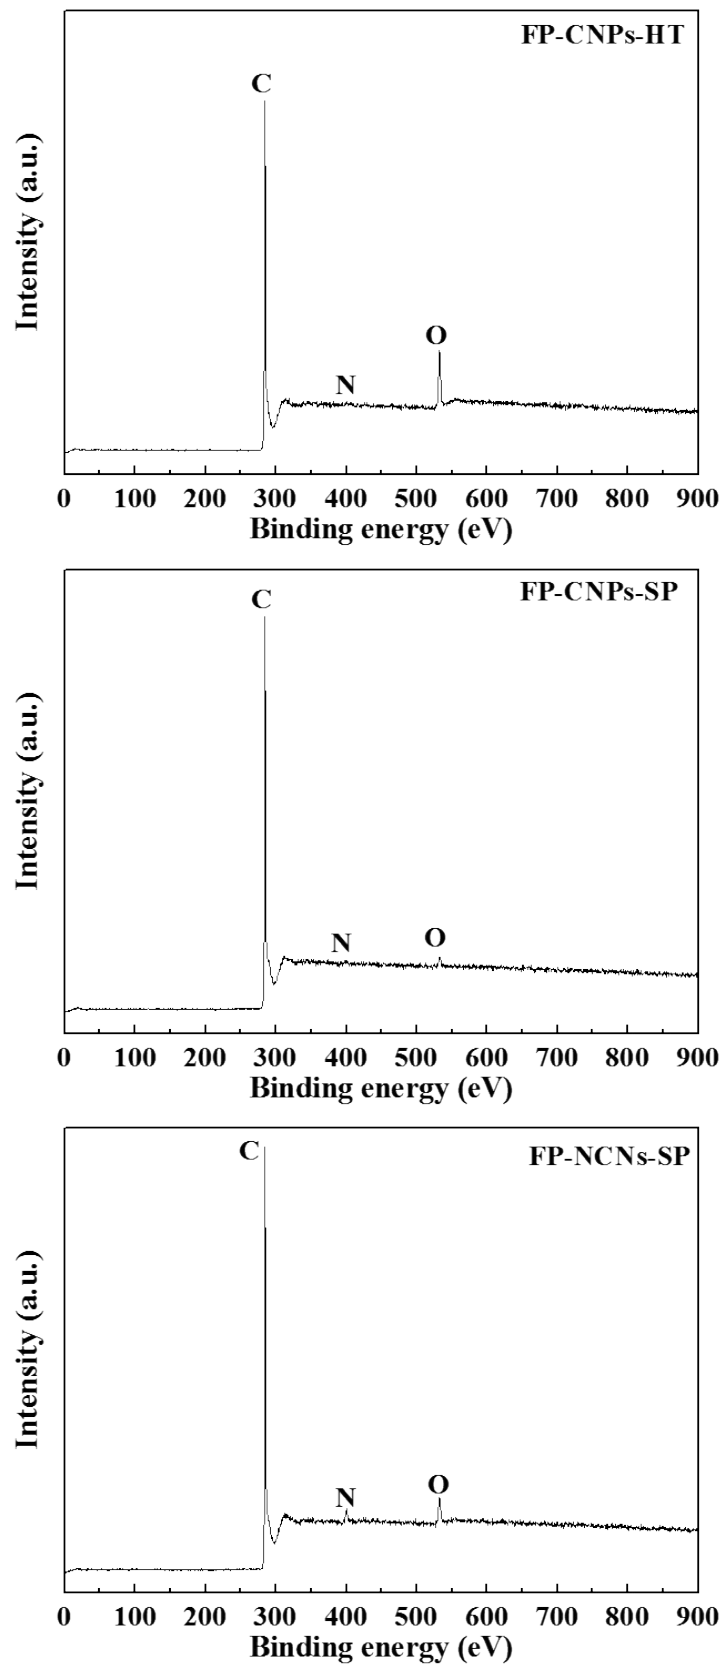

**Fig. S1** Survey X-ray photoelectron spectroscopy (XPS) spectra of FP-CNSs-SP, FP-CNPs-SP, and FP-NCNs-SP.

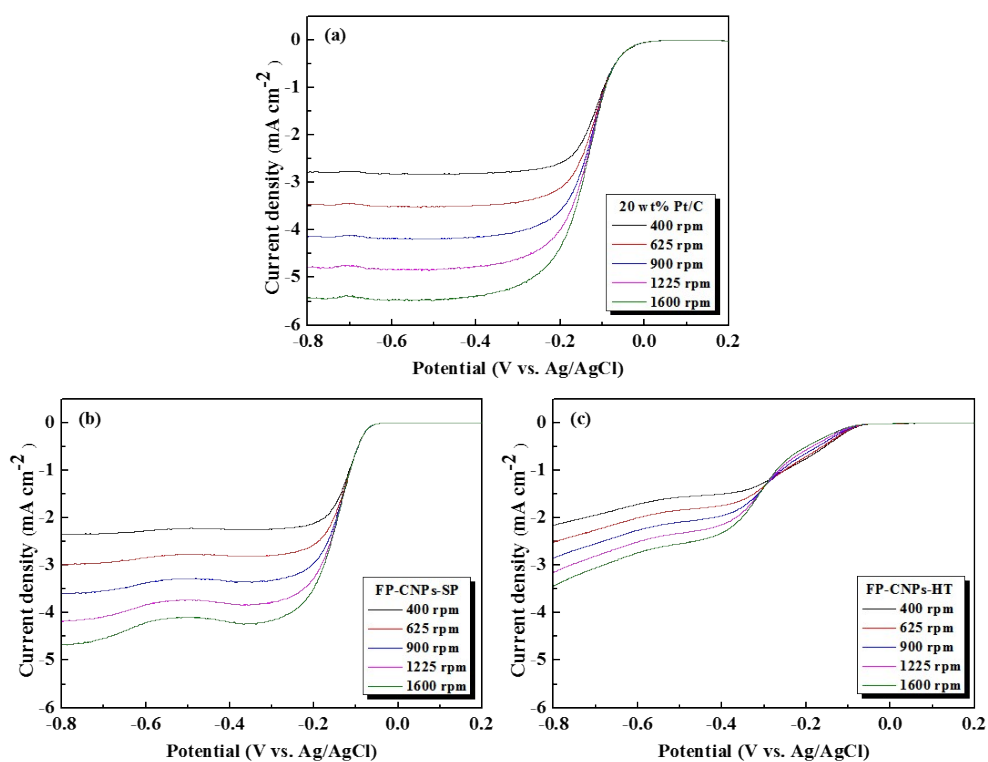

**Fig. S2** LSV curves at different rotation speeds recorded for the ORR in an  $\text{O}_2$ -saturated 0.1 M KOH solution at a scan rate of  $10 \text{ mV s}^{-1}$ : (a) 20 wt% Pt/C, (b) FP-CNPs-SP, and (c) FP-CNPs-HT.
